# Supplementary material
Source: Springer Nature journal article supplement (https://www.springermedizin.de/resource/supplementary/12943_2004_80_MOESM7_ESM.pdf/9553390)

6A

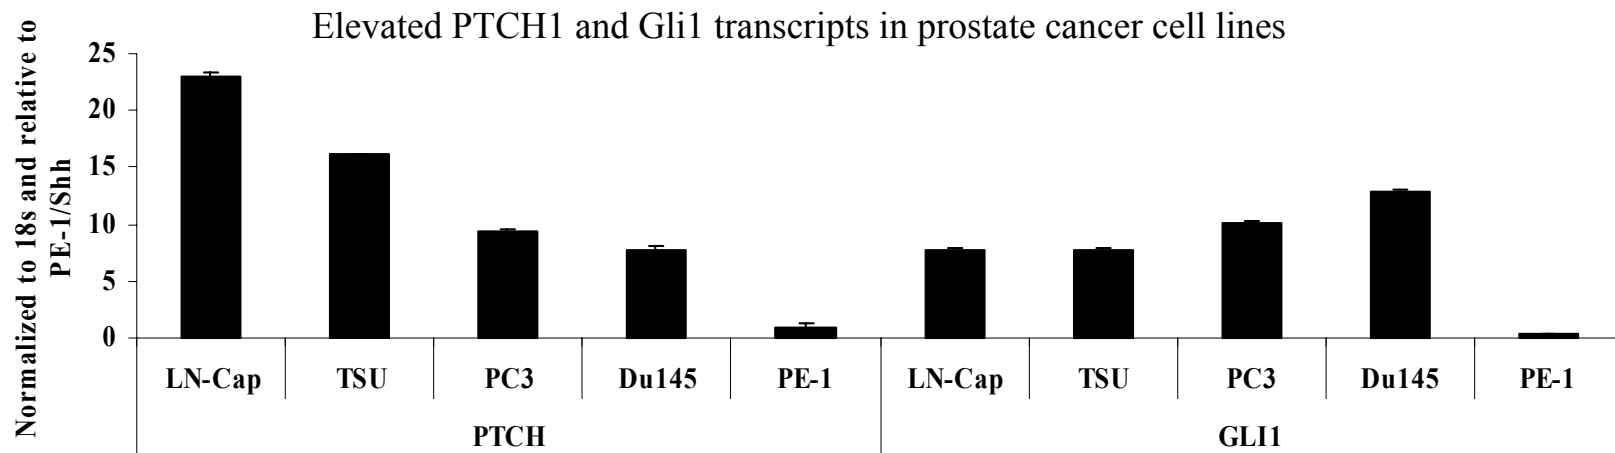

6B

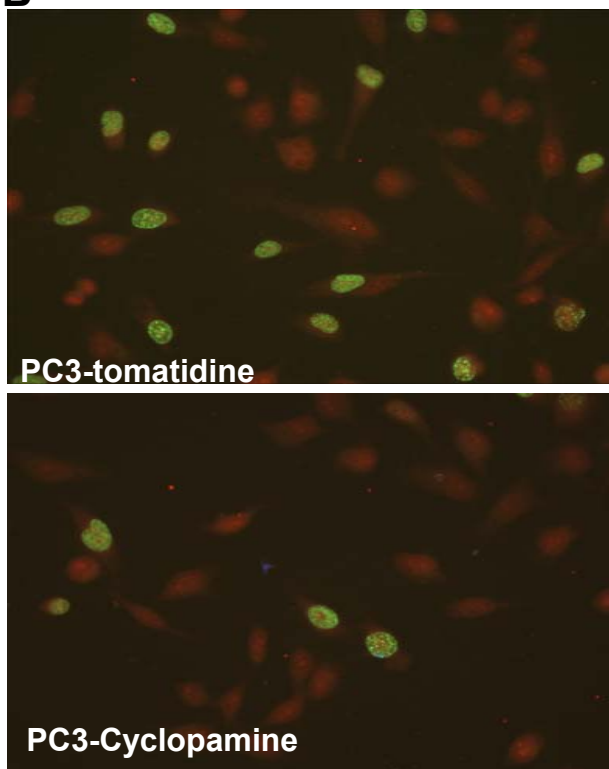

6C

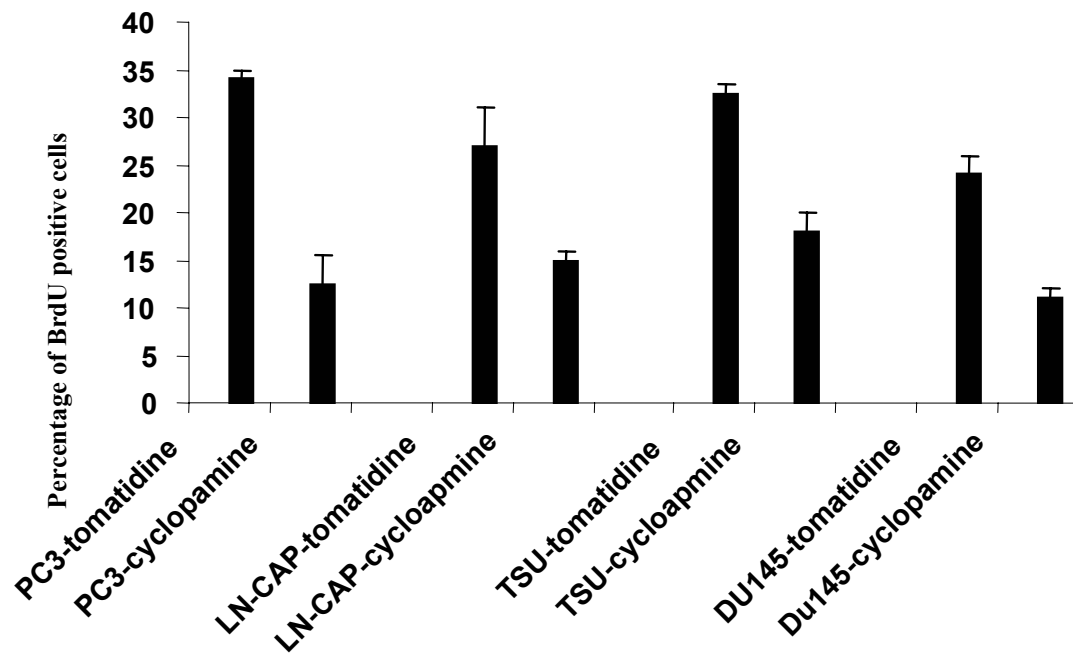

Supplement: MOESM7 [file 9553390]
